## Clinical impact of peripheral artery disease on acute coronary syndrome

F. Fonseca Goncalves, S.C. Borges, J.J. Monteiro, P.S. Mateus, J.I. Moreira

Hospital Center of Tras-os-Montes and Alto Douro, Cardiology, Vila Real, Portugal

On behalf of Investigators of the Portuguese Registry of Acute Coronary Syndromes

**Funding Acknowledgement:** Type of funding source: None

**Introduction:** Peripheral artery disease (PAD) and acute coronary syndrome (ACS) are two diseases with high morbidity and mortality and, sometimes, may be present simultaneously, making patient management more complex.

**Purpose:** This study sought to characterize and evaluate the prognostic impact of PAD in patients with an ACS.

**Methods:** This was a retrospective study of patients admitted with an ACS, periodically included in a national multicenter registry, between October 2010 and September 2019.

**Results:** Of a total of 26036 patients, 1429 had previous history of PAD. This group had a higher predominance of men (79,5% vs 72,0%,  $p<0,001$ ) and was older ( $71\pm 11$  years vs  $66\pm 14$  years,  $p<0,001$ ). Besides having a higher burden of cardiovascular risk factors, they also had more past history of myocardial infarction (MI), stroke and chronic kidney disease.

In patients with PAD, non-ST segment elevation MI was the most frequent type of MI (58,6% vs 45,0%,  $p<0,001$ ) and left ventricular ejection fraction assessed during hospitalization was lower ( $49\pm 13\%$  vs  $51\pm 12\%$ ,  $p<0,001$ ). These patients were submitted less frequently to a coronary angiography (74,0% vs 85,2%,  $p<0,001$ ) and, when performed, more cases of mul-

tivessel coronary artery disease were found (70,6% vs 50,4%,  $p<0,001$ ). Nevertheless, they were less likely to undergo revascularization, with fewer angioplasties performed (47,8% vs 64,7%,  $p<0,001$ ), despite the greater number of coronary artery bypass grafting (9,0% vs 6,0%,  $p<0,001$ ). Both during hospitalization and at discharge, ticagrelor, beta-blockers and ACE inhibitors were less prescribed in the PAD group. Statins prescription was also lower, but only at discharge.

In a multivariate regression analysis, we found that, during hospitalization, the presence of PAD was associated with a significant higher risk of myocardial reinfarction (OR 1,90 (CI 1,18–3,06)) and death (OR 1,43 (CI 1,03–2,00)). In addition, there was a tendency for more strokes (OR 1,88 (CI 0,98–3,61)). During a 1-year follow-up, PAD was also independently associated with a significant increase in mortality (HR 1,50 (CI 1,16–1,95)).

**Conclusions:** PAD is a disease present in patients with a higher number of comorbidities and is associated with more severe coronary events. Nevertheless, these patients seem to receive less evidence-based therapy. In this study, PAD was independently associated with a significant increase in short and medium-term major adverse events.

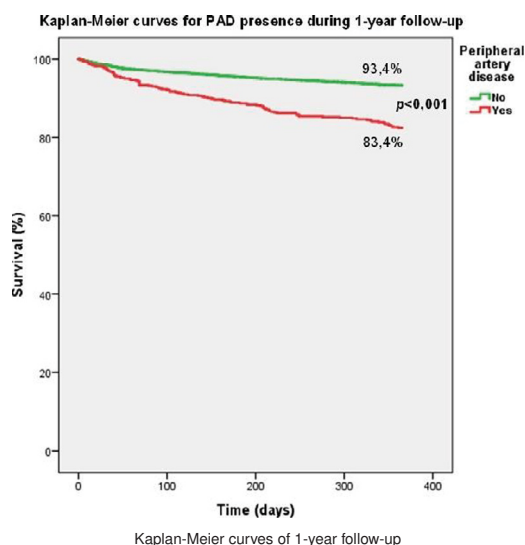

Source: http://academic.oup.com/eurheartj/article-pdf/41/Supplement_2/ehaa946.2357/34513919/ehaa946.2357.pdf
